# Supplementary material
Source: MDPI journal article supplement (https://www.mdpi.com/2073-4352/14/5/461)
Supplement: s1 [file s1]

**Table S1** : Variant classification used in the present study following the convention of Morito et al. The lattice invariant shear systems as well as the habit planes are given with reference to the austenite. Misorientation axis from  $V_1$  are given with reference to the BCC phase. The predicted habit plane which is calculated to be  $\{0.1851\ 0.7827\ 0.5942\}_\gamma$  is approximated as  $\{3\ 15\ 10\}_\gamma$ .

| Variant  | Plate group             | LIS         | Habit plane variant | Misorientation from $V_1$    |
|----------|-------------------------|-------------|---------------------|------------------------------|
| $V_1$    | PG1<br>(011) $_\gamma$  | (101)[10-1] | (-3 -15 -10)        | --                           |
| $V_{16}$ |                         | (10-1)[101] | (-3 15 10)          | 15.23° [0.09 -0.09 -0.3]     |
| $V_6$    |                         | (110)[-110] | (3 10 15)           | 56.65° [0 0.38 0.38]         |
| $V_{17}$ |                         | (-110)[110] | (3 -10 -15)         | 51.38° [-0.3 0.21 -0.3]      |
| $V_{19}$ | PG2<br>(0-11) $_\gamma$ | (110)[-110] | (3 10 -15)          | 53.1° [-0.11 0.36 0.36]      |
| $V_9$    |                         | (-110)[110] | (3 -10 15)          | 53.1° [-0.33 0.11 -0.36]     |
| $V_{24}$ |                         | (10-1)[101] | (3 15 -10)          | 19.35° [0.17 -0.02 0]        |
| $V_8$    |                         | (101)[10-1] | (3 -15 10)          | 12.63° [0.08 0.08 -0.02]     |
| $V_2$    | PG3<br>(110) $_\gamma$  | (101)[10-1] | (10 15 3)           | 60.4° [-0.31 -0.3 0.4]       |
| $V_{23}$ |                         | (10-1)[101] | (10 15 -3)          | 54.54° [-0.12 -0.34 -0.36]   |
| $V_3$    |                         | (011)[01-1] | (15 10 3)           | 59.9° [0.28 -0.41 0.28]      |
| $V_{22}$ |                         | (0-11)[011] | (-15 -10 3)         | 51.27° [-0.11 0.33 0.33]     |
| $V_{15}$ | PG4<br>(1-10) $_\gamma$ | (10-1)[101] | (10 -15 -3)         | 54.54° [-0.36 -0.12 0.34]    |
| $V_7$    |                         | (101)[10-1] | (10 -15 3)          | 49.03° [-0.28 -0.22 0.28]    |
| $V_{14}$ |                         | (011)[01-1] | (-15 10 3)          | 50.24° [-0.27 0.22 -0.31]    |
| $V_{12}$ |                         | (0-11)[011] | (15 -10 3)          | 56.32° [-0.36 0.11 -0.38]    |
| $V_4$    | PG5<br>(101) $_\gamma$  | (011)[01-1] | (15 3 10)           | 3.51° [0 -0.014 -0.027]      |
| $V_{11}$ |                         | (0-11)[011] | (15 -3 10)          | 13.68° [0.093 0.075 0.007]   |
| $V_5$    |                         | (110)[-110] | (10 3 15)           | 59.93° [-0.28 -0.28 0.41]    |
| $V_{10}$ |                         | (-110)[110] | (10 -3 15)          | 50.24° [-0.31 -0.22 0.27]    |
| $V_{21}$ | PG6<br>(10-1) $_\gamma$ | (0-11)[011] | (-15 -3 10)         | 19.49° [0.17 0 -0.025]       |
| $V_{13}$ |                         | (011)[01-1] | (-15 3 10)          | 13.68° [0.074 -0.093 -0.007] |
| $V_{20}$ |                         | (110)[-110] | (10 3 -15)          | 56.32° [-0.11 -0.38 -0.36]   |
| $V_{18}$ |                         | (-110)[110] | (10 -3 -15)         | 51.27° [-0.33 -0.11 0.33]    |

**Figure S1.**

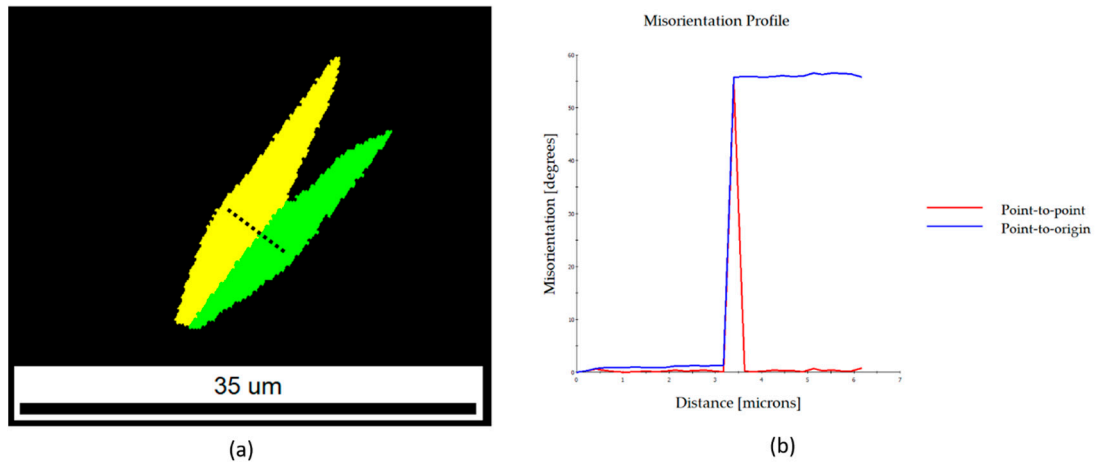

**Figure S1.** a) EBSD variant map showing the variant pair  $V_7/V_{12}$ . b) misorientation profile along the dotted line in Figure S1a. Both the point-to-point and the point-to-origin profiles show a steep increase when crossing the junction plane.

**Figure S2.**

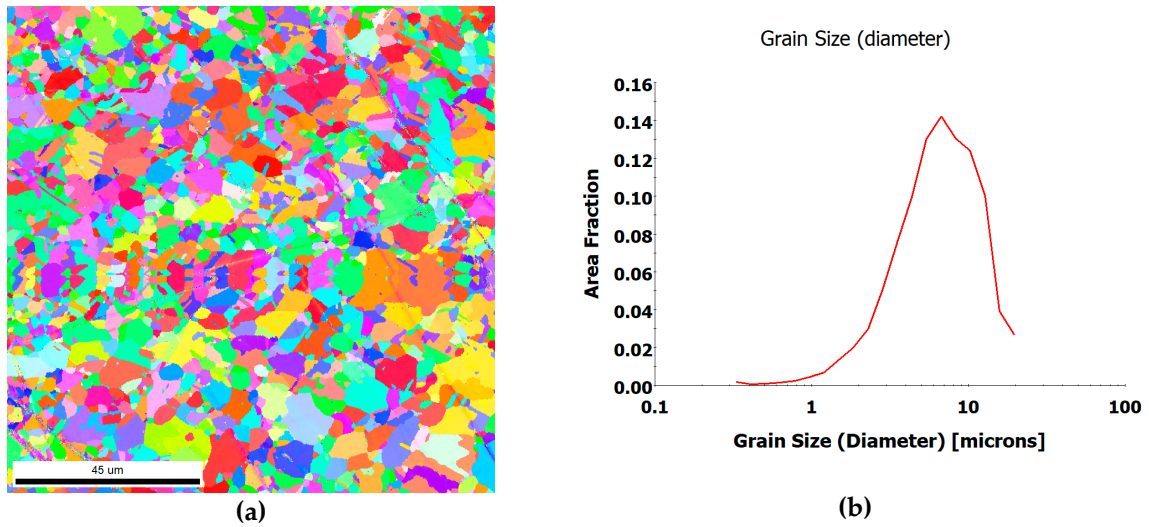

**Figure S2.** a) EBSD IPF of the FG sample before transformation and b) corresponding grain size distribution.
